# Supplementary material for: Central role of nitric oxide in ozone production in the upper tropicaltroposphere over the Atlantic Ocean and West Africa
Source: Copernicus journal article supplement (doi:10.5194/acp-2021-52), 2021-01-25
Supplement: Supplementary file 1 [file acp-2021-52-supplement.pdf]

## Supplement of

# Central role of nitric oxide in ozone production in the upper tropical troposphere over the Atlantic Ocean and West Africa

Ivan Tadic<sup>1</sup>, Clara Nussbaumer<sup>1</sup>, Birger Bohn<sup>2</sup>, Hartwig Harder<sup>1</sup>, Daniel Marno<sup>1</sup>, Monica Martinez<sup>1</sup>, Florian Obersteiner<sup>3</sup>, Uwe Parchatka<sup>1</sup>, Andrea Pozzer<sup>1,4</sup>, Roland Rohloff<sup>1</sup>, Martin Zöger<sup>5</sup>, Jos Lelieveld<sup>1,6</sup> and Horst Fischer<sup>1</sup>

<sup>1</sup>Atmospheric Chemistry Department, Max Planck Institute for Chemistry, Mainz, Germany

<sup>2</sup>Institute of Energy and Climate Research, IEK-8: Troposphere, Forschungszentrum Jülich GmbH, Jülich, Germany

<sup>3</sup>Karlsruhe Institute of Technology, Karlsruhe, Germany

<sup>4</sup>Earth System Physics section, The Abdus Salam International Centre for Theoretical Physics, Trieste, Italy

10 <sup>5</sup>Flight Experiments, German Aerospace Center (DLR), Oberpfaffenhofen, Germany

<sup>6</sup>Climate and Atmosphere Research Center, The Cyprus Institute, Nicosia, Cyprus

**Correspondence:** Ivan Tadic (i.tadic@mpic.de) or Horst Fischer (horst.fischer@mpic.de)

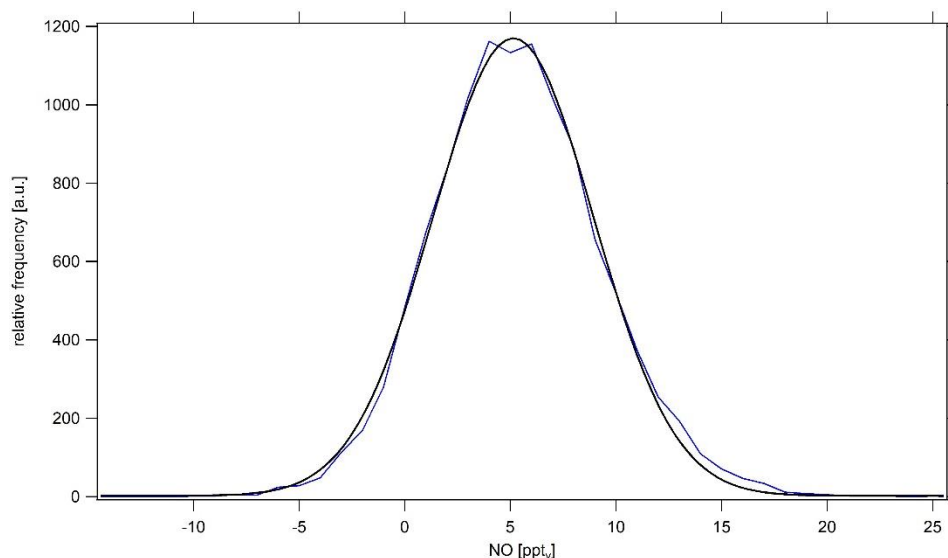

15 **Figure S1: Distribution of in situ NO data (1 s time resolution) obtained during night-time during MF11. Note that the data have not been corrected for the residual instrumental background. The black trace shows a Gaussian fit to the obtained distribution from which the LOD and residual background corrections were retrieved.**

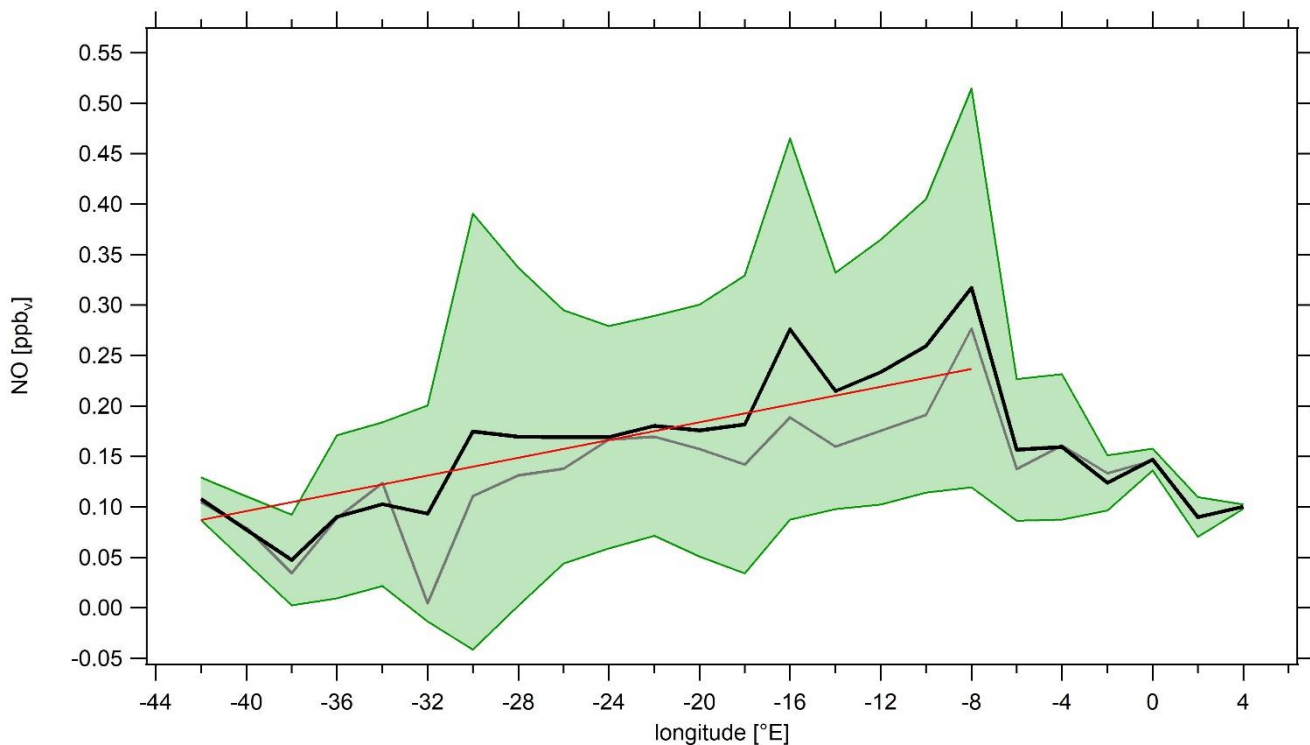

**Figure S2: Longitudinal profile of NO data obtained above 12 km at a longitudinal resolution of 2 degree. The black and grey traces represent the average and median longitudinal profile, respectively. The green background represents  $\pm 1$  standard deviation of the average profile. A linear fit to the averaged data in the interval from  $-42^\circ$  E to  $-8^\circ$  E (least squares method, weighted by standard deviation of the respective average) yields a longitudinal increase in NO of about 4.4 pptv per degree longitude towards the West African continent. Note that data obtained at latitudes eastbound of  $-4^\circ$  N were observed over the European continent.**

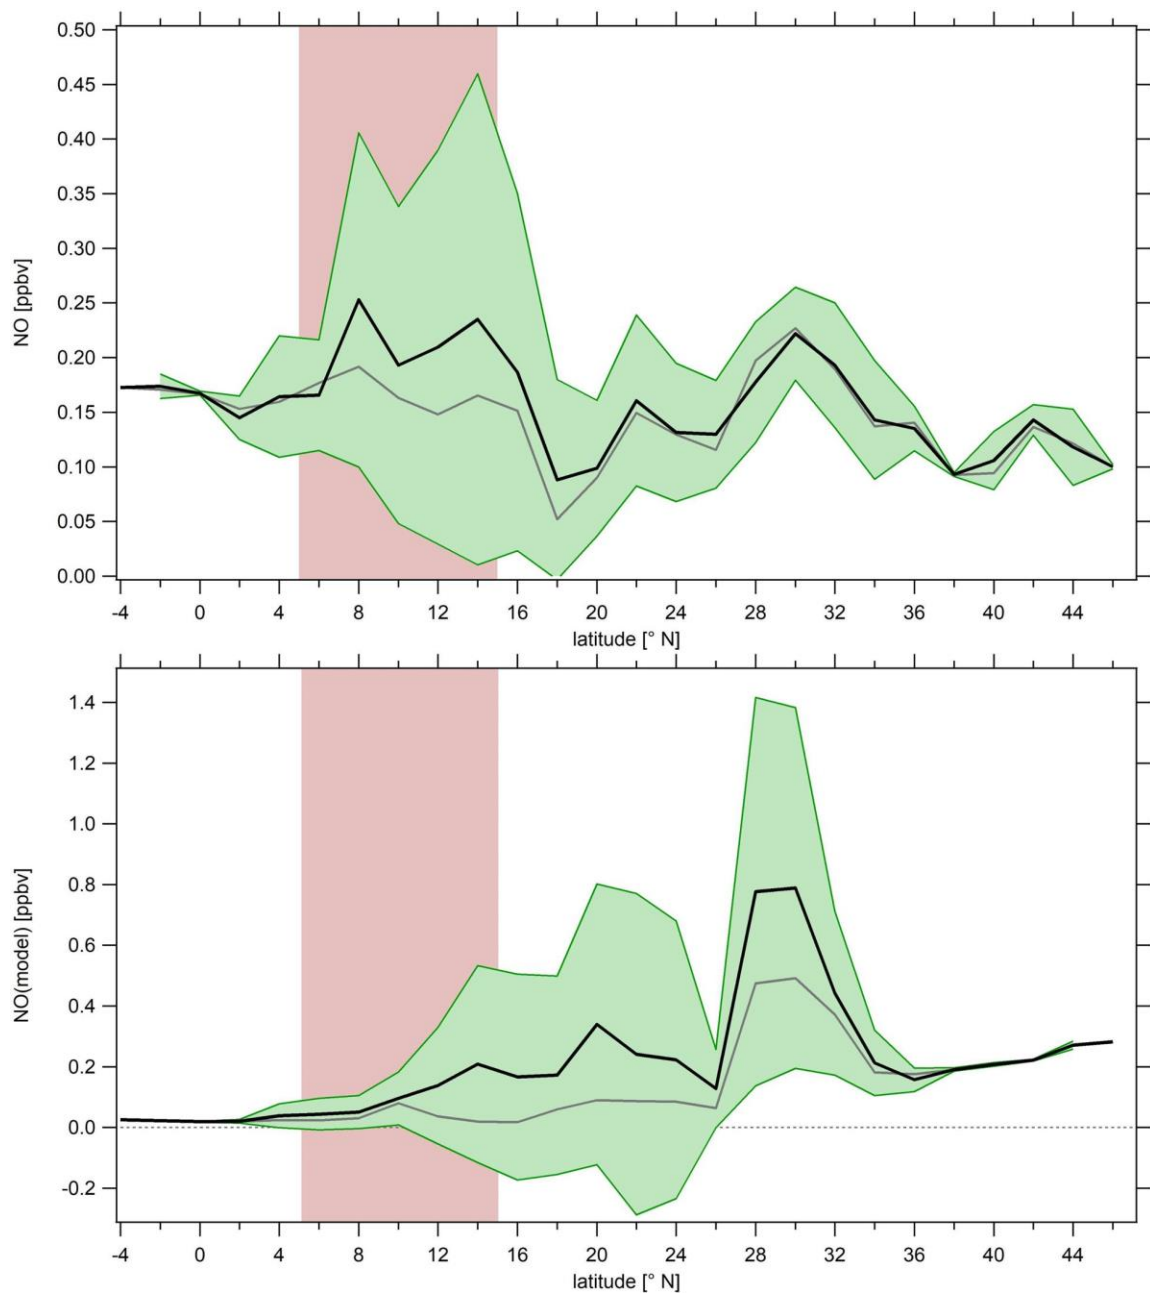

**Figure S3: Latitudinal profile of measured (upper plot) and simulated (lower plot) NO data obtained above 12 km at a latitudinal resolution of 2 degree. The black and grey traces represent the average and median latitudinal profile, respectively. The green background represents  $\pm 1$  standard deviation of the average profile. The red box in the background indicates the supposable location of the ITCZ during August and September. The profiles were filtered for stratospheric measurements by removing data for which concurrent  $O_3$  is  $> 100$  ppbv.**

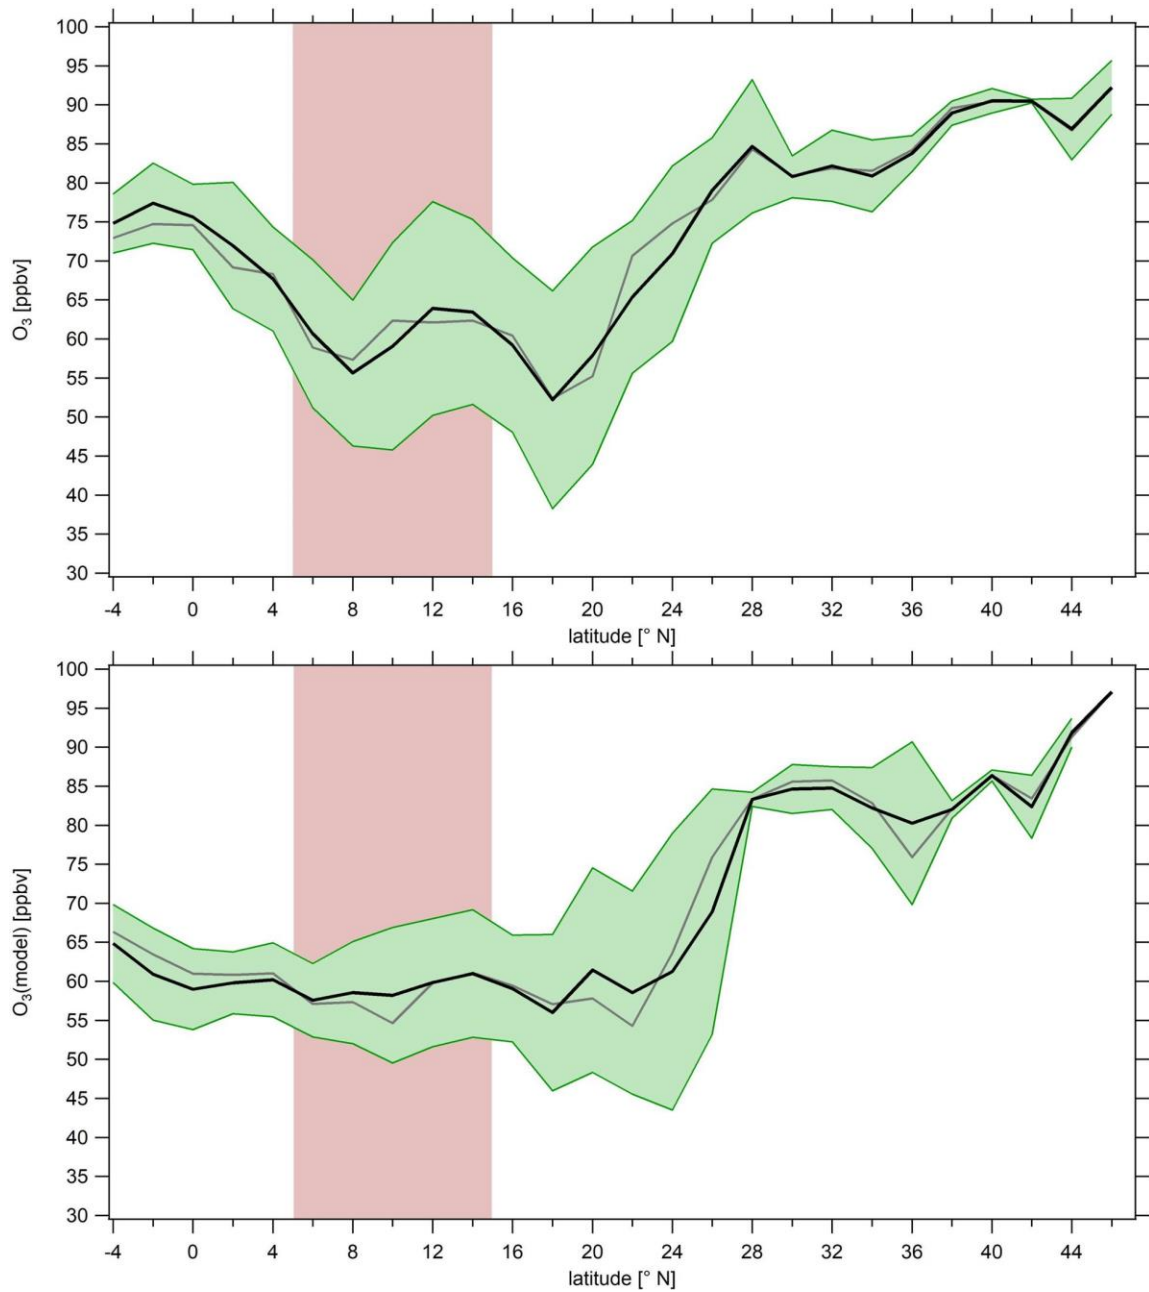

**Figure S4: Latitudinal profile of measured (upper plot) and simulated (lower plot) O<sub>3</sub> data obtained above 12 km at a latitudinal resolution of 2 degree. The black and grey traces represent the average and median latitudinal profile, respectively. The green background represents  $\pm 1$  standard deviation of the average profile. The red box in the background indicates the supposable location of the ITCZ during August and September. The profiles were filtered for stratospheric measurements by removing data for which concurrent O<sub>3</sub> is > 100 ppbv.**

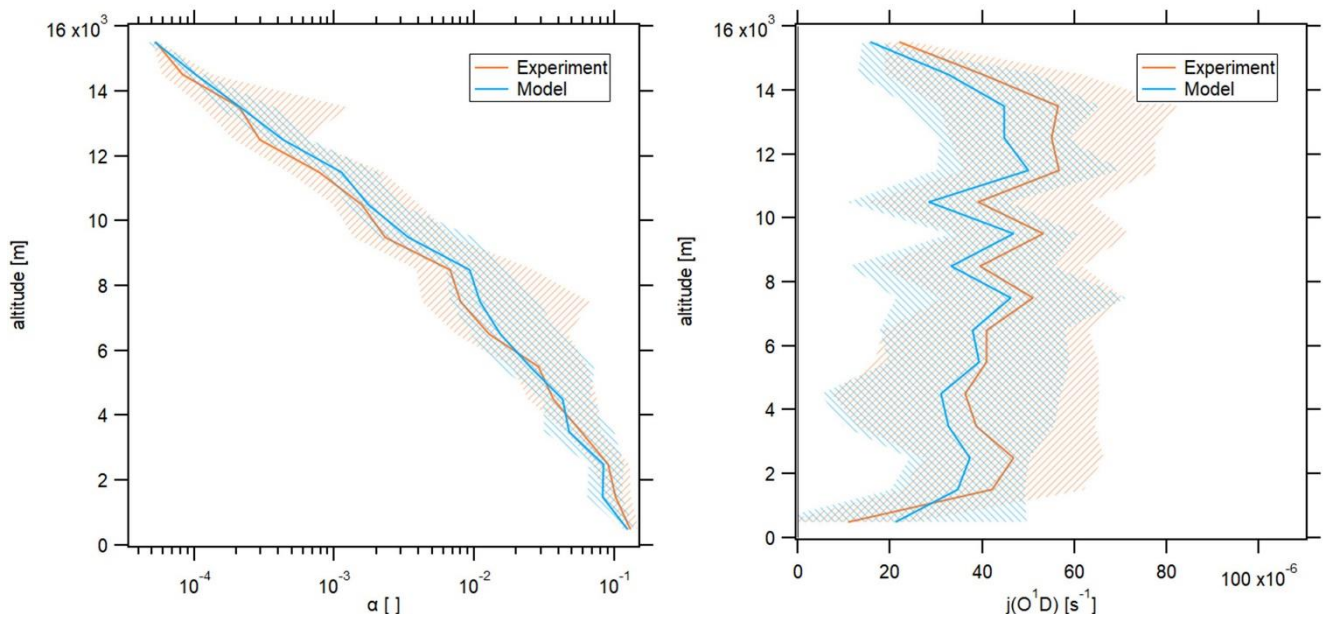

**Figure S5: Vertical, tropospheric profile of  $\alpha$  calculated based on measured and simulated data during CAFE-Africa (left graph). Vertical, tropospheric profile of  $j(\text{O}^1\text{D})$  (measured and simulated) obtained during CAFE-Africa (right graph). The orange and blue traces represent measured and simulated results, respectively.**

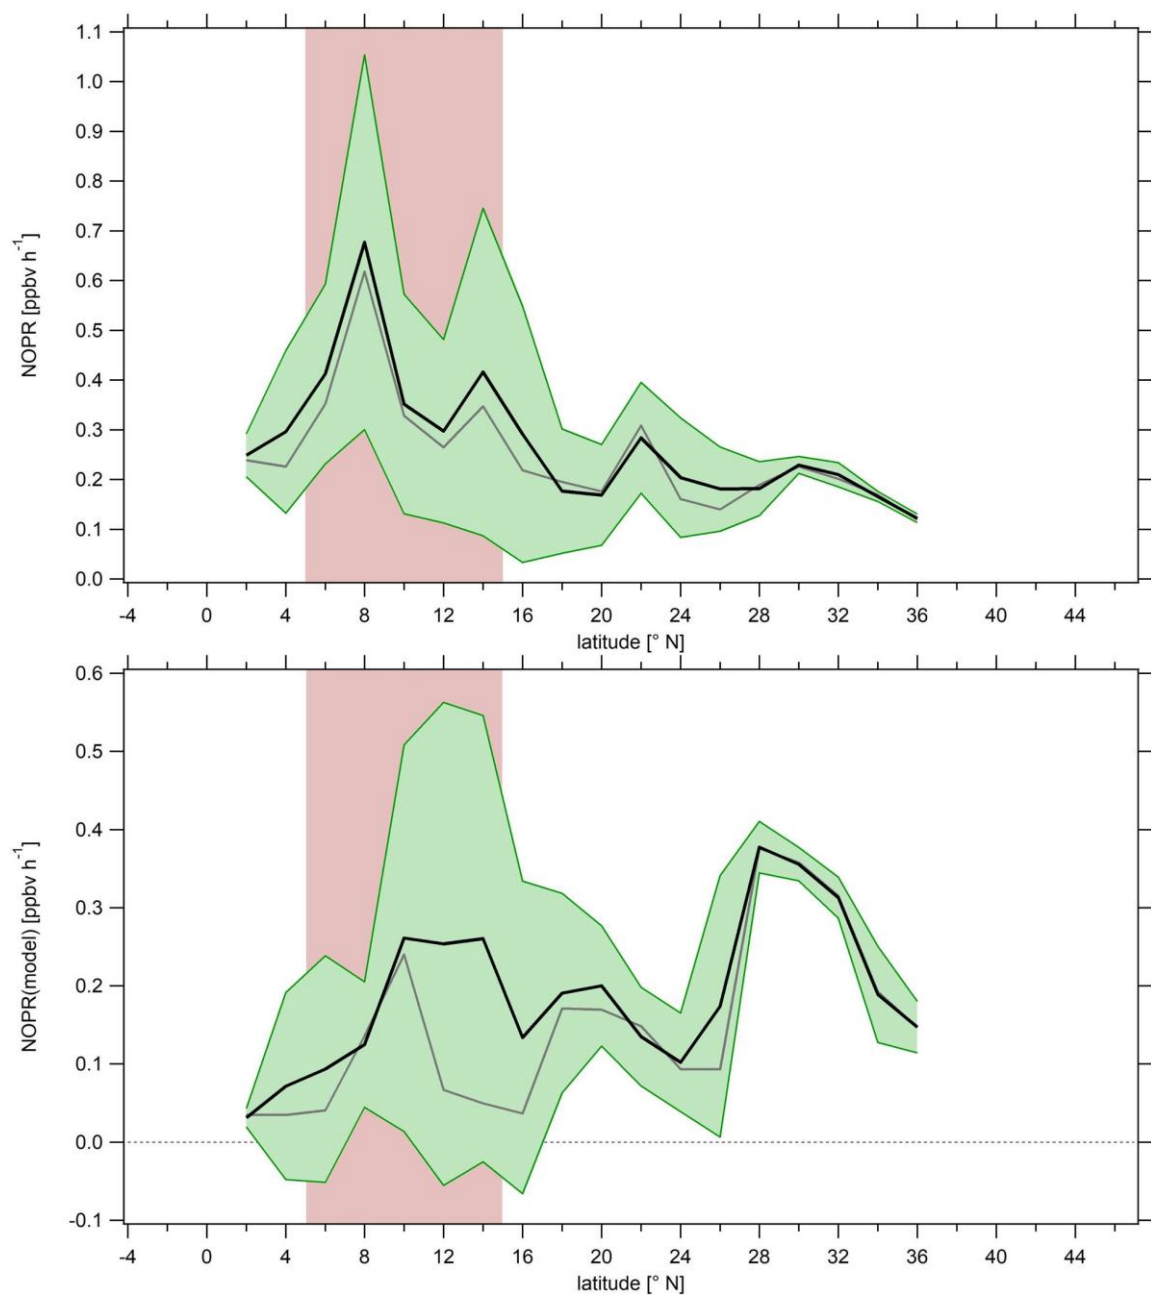

5 **Figure S6: Latitudinal profile of NOPRs derived from measured (upper plot) and simulated (lower plot) data above 12 km at a latitudinal resolution of 2 degree. The black and grey traces represent the average and median latitudinal profile, respectively. The green background represents  $\pm 1$  standard deviation of the average profile. The red box in the background indicates the supposable location of the ITCZ during August and September. The profiles were filtered for stratospheric measurements by removing data for which concurrent  $O_3$  is  $> 100$  ppbv.**

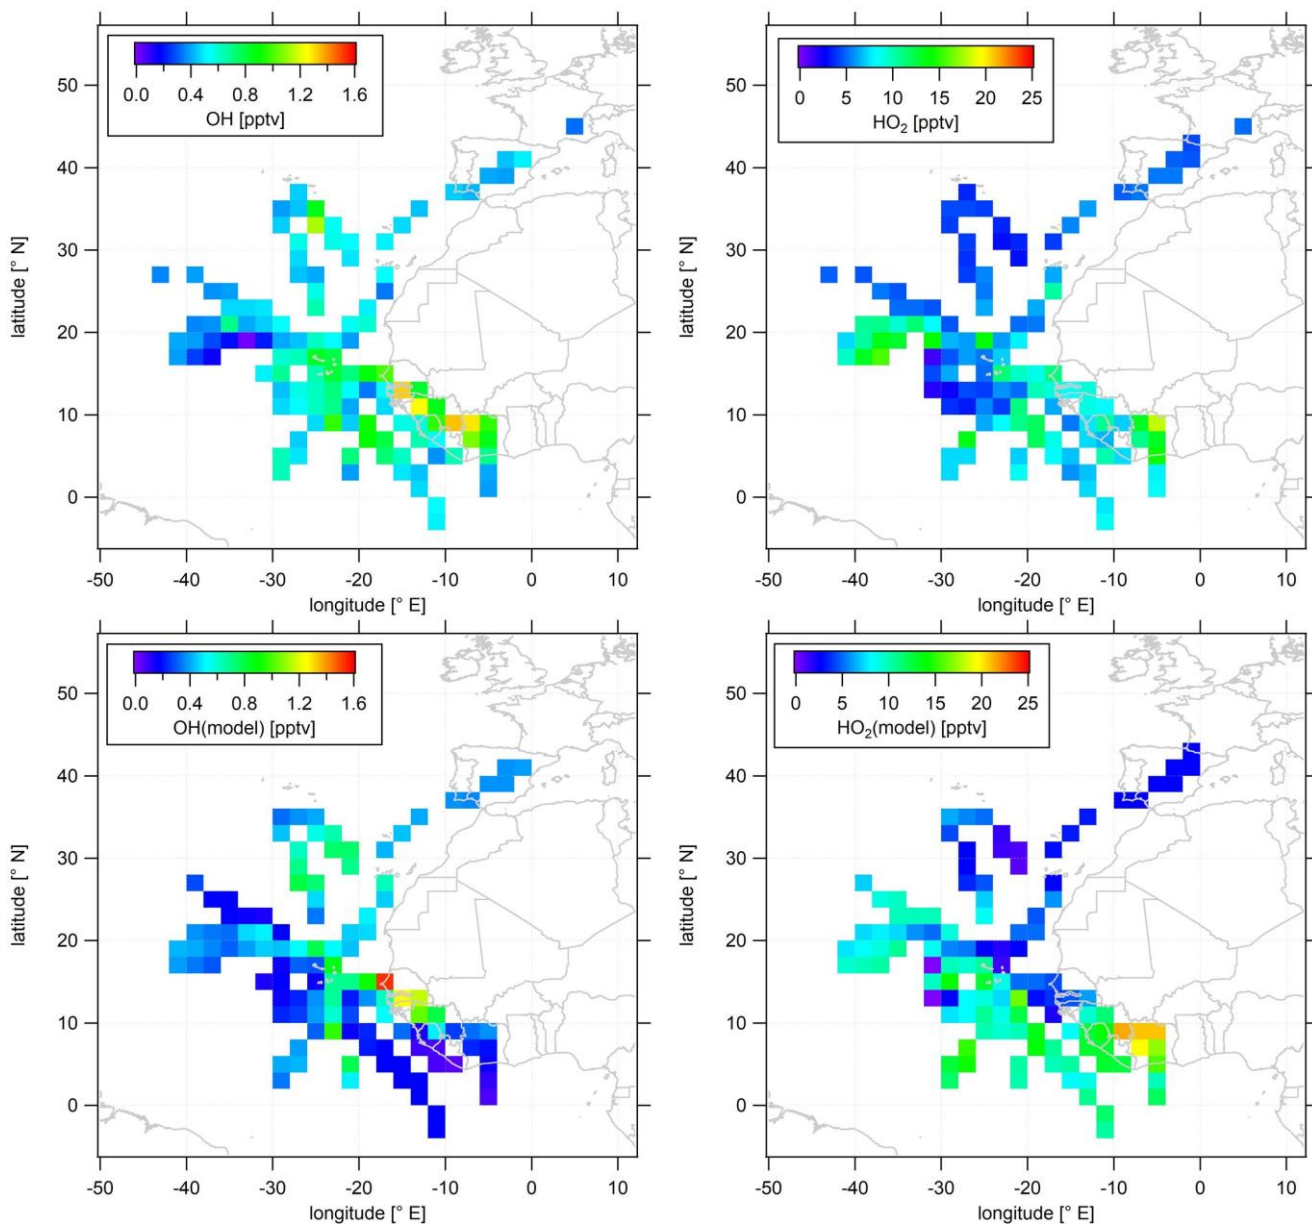

**Figure S7: Color-coded spatial, tropospheric distributions of measured and simulated OH and HO<sub>2</sub> above 12 km during CAFE-Africa. The upper graphics show the measurements, the lower graphics show the simulations. Note that the figures are filtered for stratospheric measurements by removing data points for which concurrent O<sub>3</sub> is > 100 ppbv.**

**Table ST1: Overview of the scientific measurement flights performed during CAFE-Africa. EDMO is the international civil aviation organization (ICAO) code of the airport of the DLR facility at South Germany, GVAC the ICAO code of the airport on Sal and DGAA the ICAO code of the airport of Accra (Ghana).**

| Flight number | Date of the flight | Purpose/objective of the flight               | Flight route |
|---------------|--------------------|-----------------------------------------------|--------------|
| MF03          | 07 August 2018     | ferry flight to Sal (Cape Verde Islands)      | EDMO → GVAC  |
| MF04          | 10 August 2018     | flight south / biomass burning plume          | GVAC → GVAC  |
| MF05          | 12 August 2018     | flight south / aged biomass burning plume     | GVAC → GVAC  |
| MF06          | 15 August 2018     | flight north / stratospheric influence        | GVAC → GVAC  |
| MF07          | 17 August 2018     | stack flight #1                               | GVAC → GVAC  |
| MF08          | 19 August 2018     | stack flight #2                               | GVAC → GVAC  |
| MF09          | 22 August 2018     | flight over West Africa                       | GVAC → DGAA  |
| MF10          | 24 August 2018     | flight northwest / aged biomass burning plume | GVAC → GVAC  |
| MF11          | 26 August 2018     | stack flight #3                               | GVAC → GVAC  |
| MF12          | 29 August 2018     | flight over the ITCZ                          | GVAC → GVAC  |
| MF13          | 31 August 2018     | flight over the ITCZ                          | GVAC → GVAC  |
| MF14          | 02 September 2018  | convective outflow of hurricane “Florence”    | GVAC → GVAC  |
| MF15          | 04 September 2018  | flight over West Africa                       | GVAC → GVAC  |
| MF16          | 07 September 2018  | ferry flight to Oberpfaffenhofen (Germany)    | GVAC → EDMO  |

**Table ST2: List of peroxy radicals (with less than four carbon atoms) which were used to estimate RO<sub>2</sub> (in analogy to Tadic et al., 2020).**

| Species                                                                           |
|-----------------------------------------------------------------------------------|
| HO <sub>2</sub>                                                                   |
| CH <sub>3</sub> O <sub>2</sub>                                                    |
| C <sub>2</sub> H <sub>5</sub> O <sub>2</sub>                                      |
| C <sub>2</sub> H <sub>5</sub> CO <sub>3</sub>                                     |
| CH <sub>3</sub> CO <sub>3</sub>                                                   |
| C <sub>3</sub> DIALO <sub>2</sub> (C <sub>3</sub> H <sub>3</sub> O <sub>4</sub> ) |
| CH <sub>3</sub> CHOHO <sub>2</sub>                                                |
| CH <sub>3</sub> COCH <sub>2</sub> O <sub>2</sub>                                  |
| CH <sub>3</sub> COCO <sub>3</sub>                                                 |
| CHOCOCH <sub>2</sub> O <sub>2</sub>                                               |
| CO <sub>2</sub> H <sub>3</sub> CO <sub>3</sub>                                    |
| HCOCH <sub>2</sub> CO <sub>3</sub>                                                |
| HCOCH <sub>2</sub> O <sub>2</sub>                                                 |
| HCOCO <sub>3</sub>                                                                |
| HCOCOHCO <sub>3</sub>                                                             |
| HOC <sub>2</sub> H <sub>4</sub> CO <sub>3</sub>                                   |
| HOCH <sub>2</sub> CH <sub>2</sub> O <sub>2</sub>                                  |
| HOCH <sub>2</sub> CO <sub>3</sub>                                                 |
| HOCH <sub>2</sub> COCH <sub>2</sub> O <sub>2</sub>                                |
| HOCH <sub>2</sub> O <sub>2</sub>                                                  |
| CH <sub>3</sub> CHO <sub>2</sub> CH <sub>2</sub> OH                               |
| IC <sub>3</sub> H <sub>7</sub> O <sub>2</sub> (isopropylperoxy radical)           |
| NC <sub>3</sub> H <sub>7</sub> O <sub>2</sub> (propylperoxy radical)              |
| NCCH <sub>2</sub> O <sub>2</sub>                                                  |
| NO <sub>3</sub> CH <sub>2</sub> CO <sub>3</sub>                                   |
| CH <sub>3</sub> CHO <sub>2</sub> CH <sub>2</sub> ONO <sub>2</sub>                 |
